# Supplementary material for: TRPM6 and TRPM7 differentially contribute to the relief of heteromeric TRPM6/7 channels from inhibition by cytosolic Mg2+ and Mg·ATP
Source: PubMed Central journal article supplement (PMC5562840; doi:10.1038/s41598-017-08144-1), 2017-08-18

# Supplementary information

**TRPM6 and TRPM7 differentially contribute to the relief of heteromeric TRPM6/7 channels from inhibition by cytosolic Mg<sup>2+</sup> and Mg-ATP**

**Authors:**

Silvia Ferioli<sup>1</sup>, Susanna Zierler<sup>1</sup>, Joanna Zaißerer<sup>1</sup>, Johann Schredelseker<sup>1</sup>, Thomas Gudermann<sup>1,2,3\*</sup> and Vladimir Chubanov<sup>1\*</sup>

**\*Contact:**

[vladimir.chubanov@lrz.uni-muenchen.de](mailto:vladimir.chubanov@lrz.uni-muenchen.de); [thomas.gudermann@lrz.uni-muenchen.de](mailto:thomas.gudermann@lrz.uni-muenchen.de)

**Affiliations:**

<sup>1</sup>Walther Straub Institute of Pharmacology and Toxicology, LMU Munich, Munich, Germany;

<sup>2</sup>German Center for Lung Research, Munich, Germany; <sup>3</sup>German Centre for Cardiovascular Research, Munich Heart Alliance, Munich, Germany

## Supplementary Figure legends

**Supplementary Figure S1.** Assessment of hTRPM6 in HEK 293 cells.

(A) *Left panel:* Whole-cell currents measured in hTRPM6- (pCINeo-hTRPM6-IRES-GFP) transfected HEK 293 cells. To induce hTRPM6 currents, cells were perfused either with a standard  $[Mg^{2+}]_i$ -free intracellular solution or with a solution containing 1  $\mu$ M free  $[Mg^{2+}]_i$ . Current amplitudes (mean  $\pm$  SEM) were acquired at -80 and +80 mV and plotted over time.

*Right panel:* Representative current-voltage (I-V) relationships of currents at 200 s illustrated in *Left panel*. (B) Tet-induced (1  $\mu$ g/ml doxycycline, 20-24 h) and uninduced HEK-293 T-Rex cells stably expressing hTRPM6 were examined as in (A) using the standard  $[Mg^{2+}]_i$ -free intracellular solution. Current amplitudes (mean  $\pm$  SEM) were acquired at -80 mV and plotted over time. For comparison, mTRPM6 currents measured in HEK 293 cells transiently transfected with pIRES2-mTRPM6-EGFP (already shown in Fig. 2A) and hTRPM6 currents in HEK 293 cells transiently transfected with pCINeo-hTRPM6-IRES-GFP (already shown in (A)) are also included. n, number of cells measured.

**Supplementary Figure S2.** Functional expression of mTRPM6 in HEK 293 cells and trophoblast stem (TS) cells.

(A) *Left panel:* mTRPM6 in pcDNA3.1 was co-transfected with an EGFP construct (pcDNA3.1) in HEK 293 cells and whole-cell currents were measured at -80 and +80 mV in EGFP-positive cells similarly as described in Fig. 2A using the standard  $[Mg^{2+}]_i$ -free intracellular solution. Current amplitudes (mean  $\pm$  SEM) were acquired at -80 and +80 mV and plotted over time.

*Right panel:* Representative I-V relationship obtained at 70 s for currents shown in the *Left panel*. (B) Comparison of whole-cell currents measured in *Trpm7*-deficient TS cells electroporated with mTRPM6 (pIRES2-mTRPM6-EGFP). TS cells were perfused either with a standard  $[Mg^{2+}]_i$ -free intracellular solution or with a solution containing 1  $\mu$ M free  $[Mg^{2+}]_i$ . Current amplitudes (mean  $\pm$  SEM) were acquired at -80 and +80 mV and plotted over time. Note that mTRPM6 currents measured in the absence of  $[Mg^{2+}]_i$  were already shown in Fig. 2E. n, number of cells measured.

**Supplementary Figure S3.** Examining of Ba<sup>2+</sup> permeability of mTRPM7 and mTRPM6.

(A) *Left panel:* Whole-cell currents were recorded in mTRPM7-transfected HEK 293 cells using the standard [Mg<sup>2+</sup>]<sub>i</sub>-free internal solution and standard external solution. When currents started to develop, cells were subsequently exposed to the external solution containing 10 mM Ba<sup>2+</sup> as indicated by a bar. Data are shown as I/I<sub>max</sub> ± SEM (I<sub>max</sub> value was obtained in a ramp before application of 10 mM Ba<sup>2+</sup>). *Middle panel:* Representative I-V relationships of inward currents obtained before (blue) and during (red) application of 10 mM Ba<sup>2+</sup> as indicated in the *Left panel*. *Right panel:* Bar graphs of inward currents (-80 mV, mean I/I<sub>max</sub> ± SEM) obtained before (blue) and during (red) application of 10 mM Ba<sup>2+</sup> as indicated in the *Left panel*.

(B) Changes in the mTRPM6 currents by exposure of cells to the external solution containing 10 mM Ba<sup>2+</sup>. Measurements and analysis were performed similarly to (A). n, number of cells measured; \* P < 0.05; \*\*\* P < 0.001 (two-tailed t-test).

**Supplementary Figure S4.** Western blot analysis of HEK 293 cells expressing mTRPM6, mTRPM7 and mTRPM6/7.

HEK 293 cells were transiently transfected by mTRPM6 or/and mTRPM7 cDNA constructs and cell lysates were probed either with an anti-mTRPM6 antibody (α-TRPM6, *Upper panel*) or an anti-mTRPM7 antibody (α-TRPM7, *Lower panel*). The expected locations of proteins are indicated by red arrows. Representative blots are shown. The experiment was repeated three times with similar results.

**Supplementary Figure S5.** Co-immunoprecipitation of mTRPM6 and mTRPM7.

mTRPM7 was C-terminally tagged with a myc tag (M7-myc) and expressed alone or co-expressed with YFP-tagged mTRPM7 (M7-YFP), mTRPM6 (M6-YFP) and mTRPM5 (M5-YFP) in HEK 293 cells as indicated above the panels. Protein A/G magnetic beads and an anti-myc antibody were used to immunoprecipitate channel complexes from the corresponding cell lysates. Immunoprecipitates (IP) and cell lysates (Input) were analysed by immunoblotting with an anti-GFP antibody (α-GFP) cross-reacting with YFP tags or anti-myc antibody (α-myc). The

expected location of the tagged TRPM proteins are indicated on the right side of the blots. Representative blots are shown. The experiment was repeated two times with similar results.

**Supplementary Figure S6.** Western blot analysis of the plasma membranes from HEK 293 cells expressing mTRPM6, mTRPM7 and mTRPM6/7.

HEK 293 cells were transiently transfected by mTRPM6 or/and mTRPM7 cDNA constructs and plasma membranes were probed either by an anti-TRPM6 antibody, anti-TRPM7 antibody ( $\alpha$ -TRPM7) and an antibody directed against the plasma membranes marker  $\text{Na}^+/\text{K}^+$  ATPase ( $\alpha$ - $\text{Na}^+/\text{K}^+$  ATPase). The expected locations of the proteins are indicated by red arrows. Representative blots are shown. The experiment was repeated three times with similar results.

**Supplementary Figure S7.** Co-expression of mTRPM6-K1810R and mTRPM7 in HEK 293 cells.

(A) Whole-cell currents measured in HEK 293 cells co-expressing mTRPM6-K1810R and wildtype mTRPM7 using the standard  $[\text{Mg}^{2+}]_i$ -free internal solution and solutions containing either 250  $\mu\text{M}$  free  $[\text{Mg}^{2+}]_i$  or 9 mM  $[\text{Mg}\cdot\text{ATP}]_i$  and 250  $\mu\text{M}$  free  $[\text{Mg}^{2+}]_i$ . (B) Bar graphs of outward currents at 200 s (+80 mV, mean  $\pm$  SEM) shown in (A). n, number of cells measured; n.s., not significant; \*\*  $P < 0.01$  (ANOVA).

**Supplementary Figure S8.** Effect of NS8593 and naltriben on mTRPM6 and mTRPM6/7 currents.

(A) Inhibition of mTRPM6 currents by 10  $\mu\text{M}$  NS8593. *Left panel:* Whole-cell currents measured in mTRPM6-transfected HEK 293 cells. Current amplitudes (mean  $\pm$  SEM) measured at -80 and +80 mV were plotted over time. Currents were induced using the standard  $[\text{Mg}^{2+}]_i$ -free intracellular solution and the standard external solution. When currents started to develop, cells were exposed to 10  $\mu\text{M}$  of NS8593 as indicated by the black bar. A subset of mTRPM6-positive cells was examined without application of NS8593. *Middle panel:* Representative I-V relationships obtained from individual ramps before (blue) and during (red

and green) application of NS8593 as indicated in the *Left panel*. *Right panel*: Bar graphs of outward currents (+80 mV, mean  $\pm$  SEM) obtained from untreated (green) and NS8593-treated cells (red) as indicated in the *Left and Middle panels*. \*\*\*  $P < 0.001$  (two-tailed t-test). **(B)** Stimulation of mTRPM7 currents by naltriben. Current amplitudes (mean  $\pm$  SEM) were measured at -80 and +80 mV and plotted over time. Currents were induced using an intracellular solution containing 2 mM free  $[Mg^{2+}]_i$  and the standard external solution. Cells were exposed to 50  $\mu$ M naltriben as indicated by the black bar. **(C)** Assessment of 50  $\mu$ M naltriben effects on mTRPM6 currents. Measurements were performed and analysed similarly to (B) using either the standard  $[Mg^{2+}]_i$ -free intracellular solution (closed symbols) or solution containing 1  $\mu$ M free  $[Mg^{2+}]_i$  (open symbols). n.s., not significant (two-tailed t-test). **(D)** Assessment of 50  $\mu$ M naltriben effects on mTRPM6/7 currents. Measurements were performed and analysed similarly to (B). n.s., not significant (ANOVA); n, number of cells measured.

**Supplementary Figure S9.** Effect of 2-aminoethyl diphenylborinate (2-APB) on mTRPM7, mTRPM6 and mTRPM6/7 currents.

**(A)** Inhibition of mTRPM7 currents by 2-APB. *Left panel*: Whole-cell currents measured in mTRPM7-transfected HEK 293 cells. Current amplitudes (mean  $\pm$  SEM) measured at -80 and +80 mV were plotted over time. Currents were induced using the standard  $[Mg^{2+}]_i$ -free intracellular solution and the standard external solution. When currents started to develop, the cells were exposed to 200  $\mu$ M of 2-APB as indicated by the black bar. *Middle panel*: Representative I-V relationships obtained from individual ramps before (blue) and during (red) application of 2-APB as indicated in the *Left panel*. *Right panel*: Bar graphs of outward currents (+80 mV, mean  $\pm$  SEM) obtained from untreated (blue) and 2-APB-treated cells (red) as indicated in the *Left and Middle panels*. \*\*\*  $P < 0.001$  (two-tailed t-test). **(B)** Potentiation of mTRPM6 currents by 200  $\mu$ M 2-APB. Experiments were performed and analysed similarly to (A). \*  $P < 0.05$ ; \*\*  $P < 0.01$  (two-tailed t-test). **(C)** Effects of 200  $\mu$ M 2-APB on mTRPM6/7 currents. Experiments were conducted as in explained in (A). \*\*\*  $P < 0.001$  (ANOVA). n, number of cells measured.

**Supplementary Table S1.** Composition of the intracellular pipette solutions used for determination of free  $[Mg^{2+}]_i$  dose-responses.

| $^a[Mg^{2+}]_i$<br>(mM) | Cs-glutamate<br>(mM) | NaCl<br>(mM) | Cs-HEPES<br>(mM) | Cs-EGTA<br>(mM) | MgCl <sub>2</sub><br>(mM) |
|-------------------------|----------------------|--------------|------------------|-----------------|---------------------------|
| 0.10                    | 140                  | 8            | 10               | 10              | 0.16                      |
| 0.25                    | 140                  | 8            | 10               | 10              | 0.38                      |
| 0.55                    | 140                  | 8            | 10               | 10              | 0.83                      |
| 1.00                    | 140                  | 8            | 10               | 10              | 1.50                      |
| 2.30                    | 120                  | 8            | 10               | 10              | 3.40                      |
| 5.00                    | 120                  | 8            | 10               | 10              | 7.10                      |

<sup>a</sup> $[Mg^{2+}]_i$  was calculated using WebMaxC software.

**Supplementary Table S2.** Composition of the intracellular pipette solutions used for determination of  $[Mg\cdot ATP]_i$  dose-responses.

| $^a[Mg\cdot ATP]_i$<br>(mM) | $^b[Mg^{2+}]_i$<br>( $\mu M$ ) | Cs-<br>glutamate<br>(mM) | NaCl<br>(mM) | Cs-<br>HEPES<br>(mM) | Cs-<br>EGTA<br>(mM) | Cs-<br>EDTA<br>(mM) | Mg·ATP<br>(mM) | MgCl <sub>2</sub><br>(mM) |
|-----------------------------|--------------------------------|--------------------------|--------------|----------------------|---------------------|---------------------|----------------|---------------------------|
| 0.0                         | 250                            | 140                      | 8            | 10                   | 10                  | 3                   | -              | 0.38                      |
| 1.5                         | 250                            | 120                      | 8            | 10                   | 10                  | 3                   | 2.15           | 2.71                      |
| 3.0                         | 250                            | 120                      | 8            | 10                   | 10                  | 3                   | 4.30           | 2.10                      |
| 6.0                         | 250                            | 120                      | 8            | 10                   | 10                  | 3                   | 8.55           | 0.85                      |
| 9.0                         | 250                            | 120                      | 8            | 10                   | 10                  | 3                   | 12.40          | -                         |

$^a,^b[Mg\cdot ATP]_i$  and  $[Mg^{2+}]_i$  were calculated using WebMaxC software.

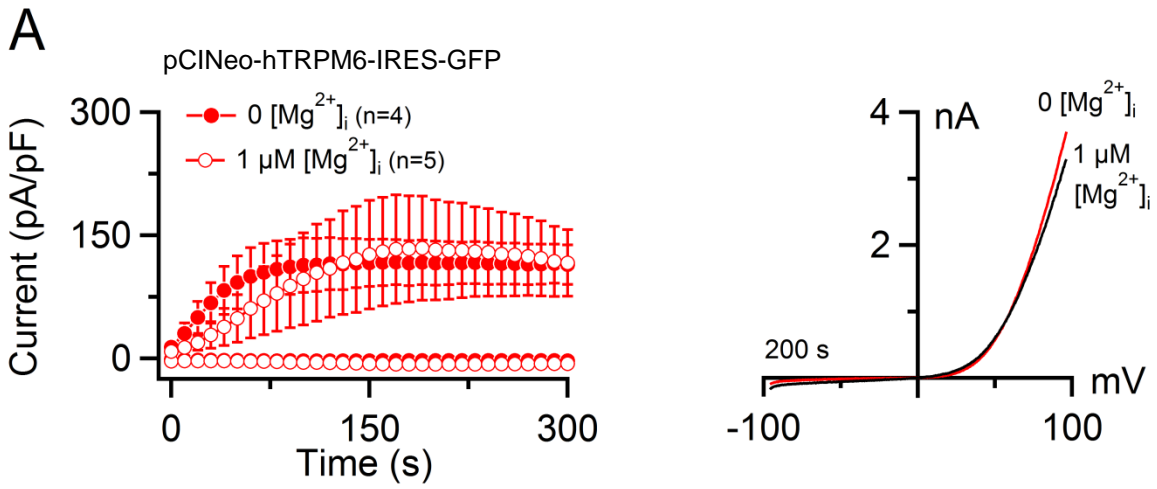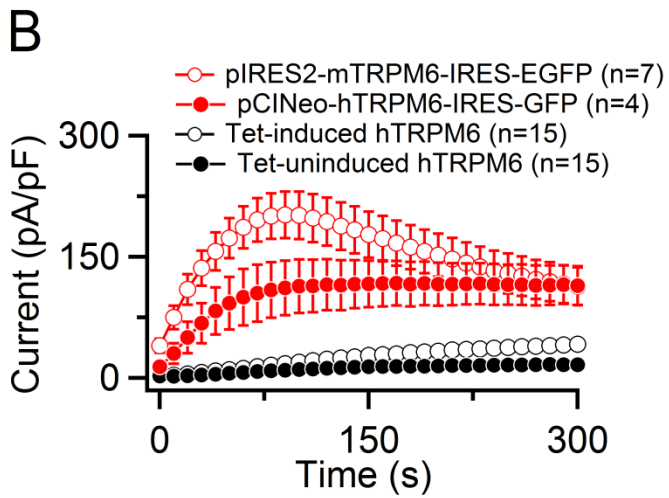



**A**

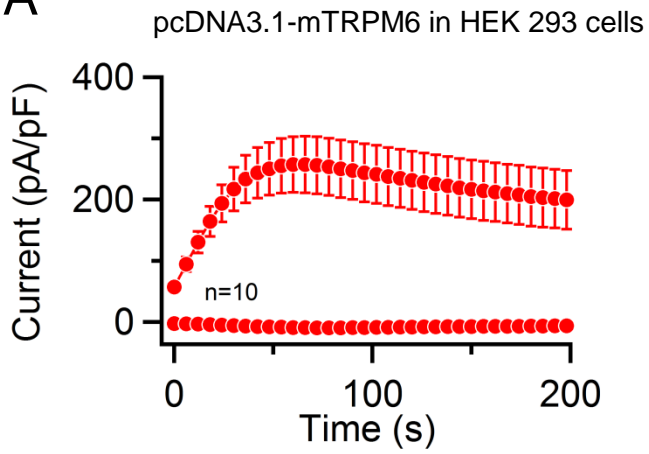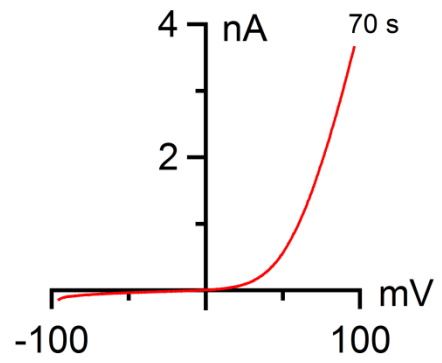

**B**

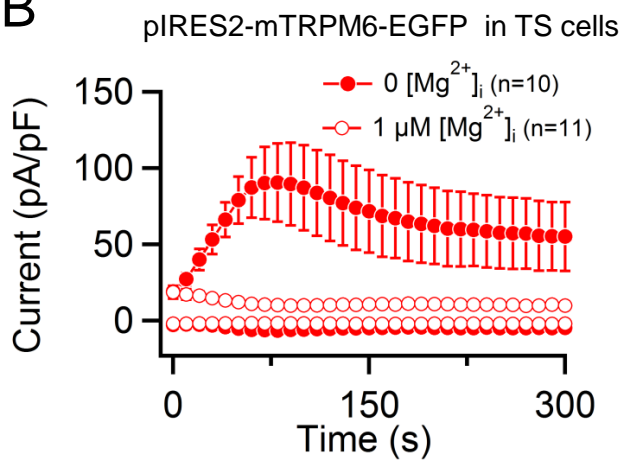

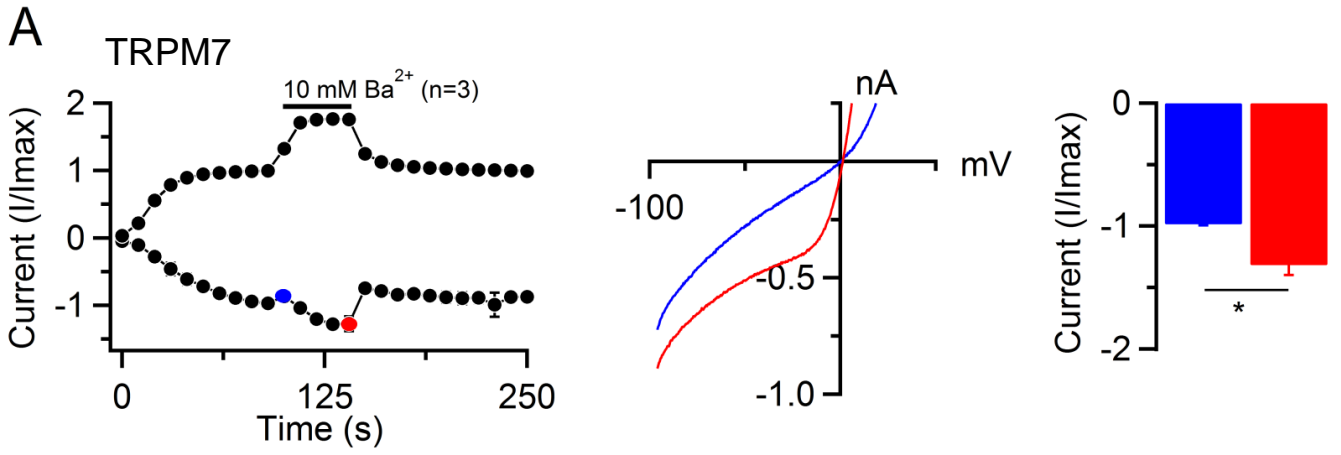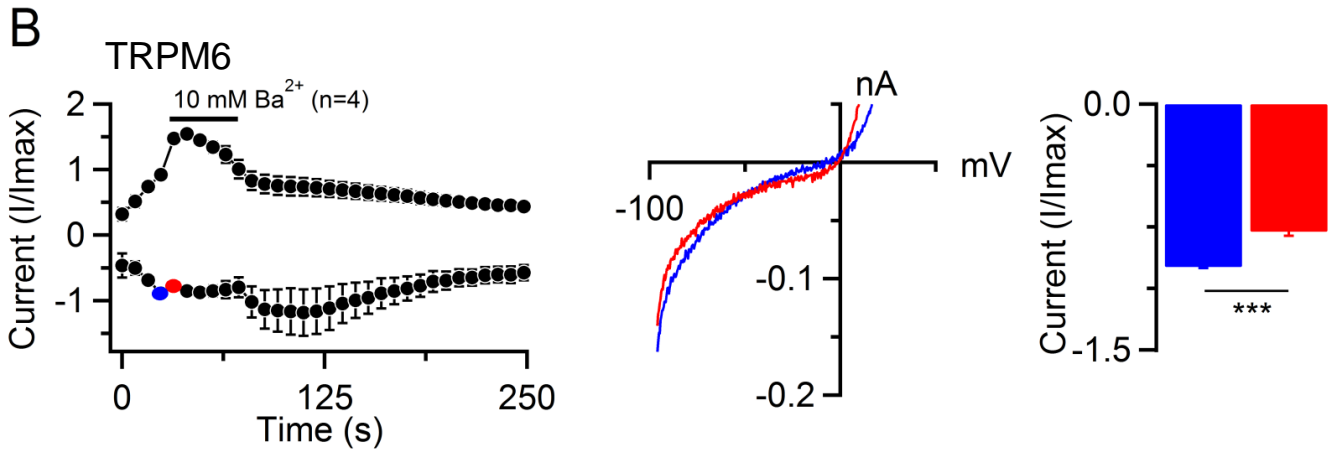

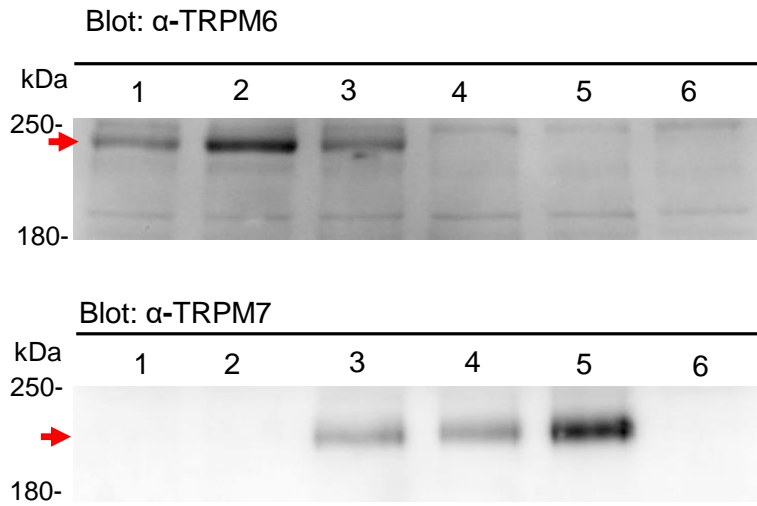

**Samples key:**

- 1 - mTRPM6 (1  $\mu$ g)
- 2 - mTRPM6 (2  $\mu$ g)
- 3 - mTRPM6 (1  $\mu$ g) + mTRPM7 (1  $\mu$ g)
- 4 - mTRPM7 (1  $\mu$ g)
- 5 - mTRPM7 (2  $\mu$ g)
- 6 - Untransfected cells

### IP $\alpha$ -myc:

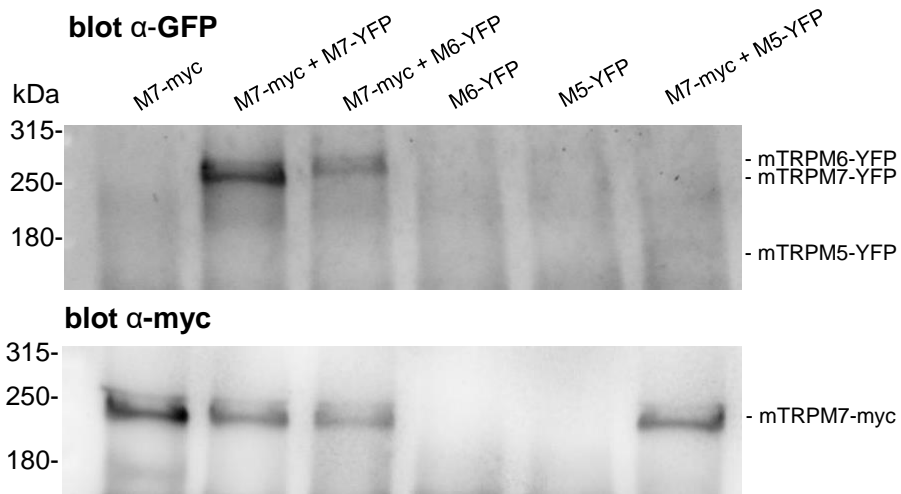

### Input (cell lysate):

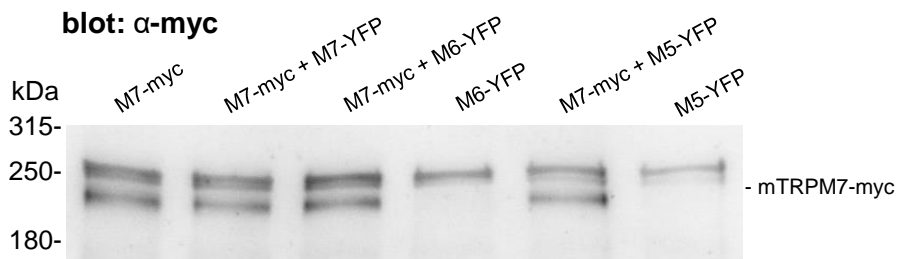

Suppl. Figure S6

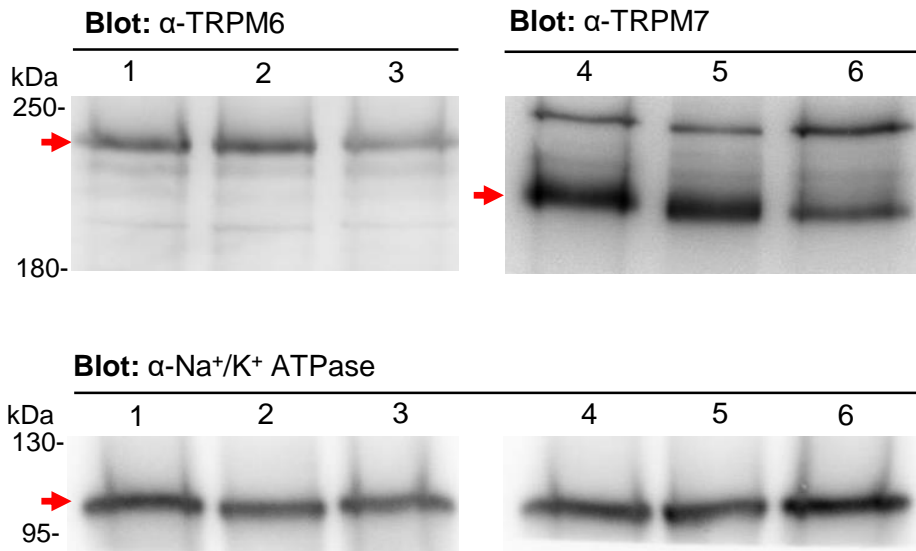

**Samples key:**

- 1 - mTRPM6 (20 μg)
- 2 - mTRPM6 (10 μg)
- 3 - mTRPM6 (10 μg) + mTRPM7 (10 μg)
- 4 - mTRPM7 (20 μg)
- 5 - mTRPM7 (10 μg)
- 6 - mTRPM6 (10 μg) + mTRPM7 (10 μg)

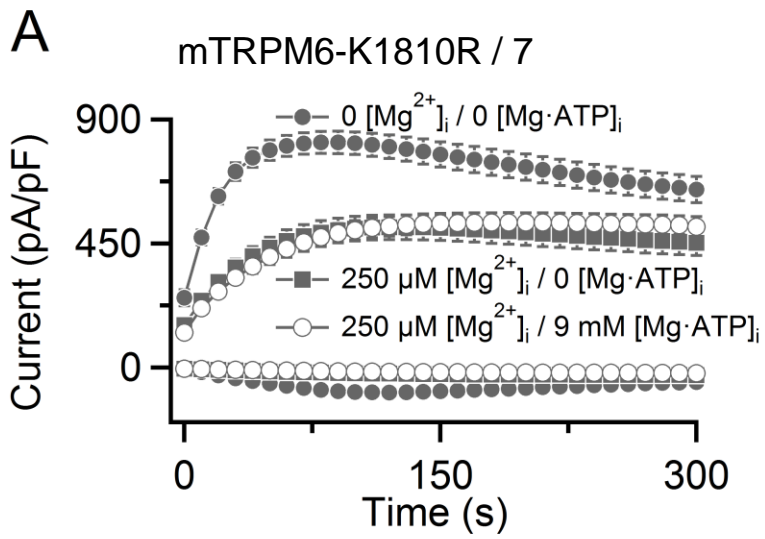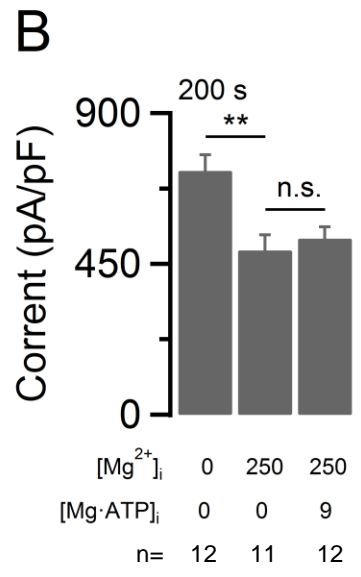

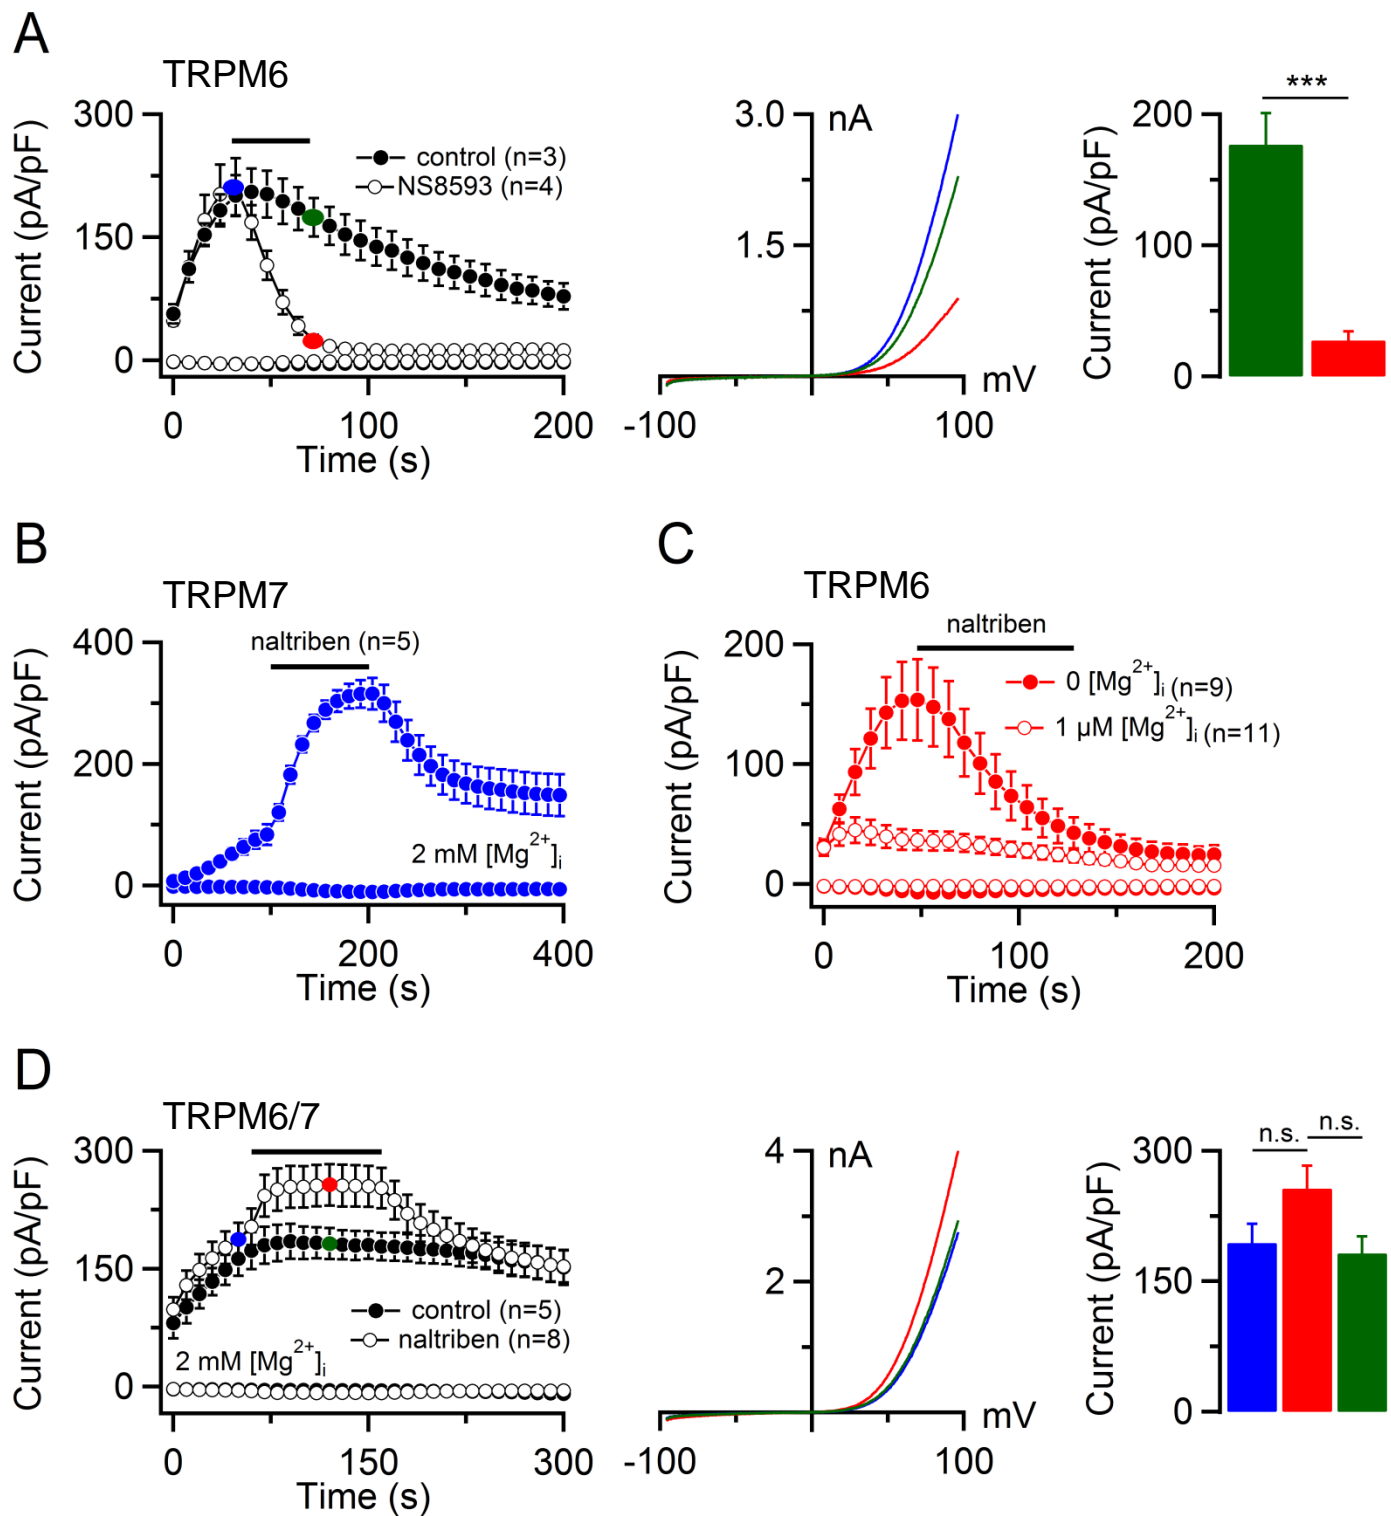

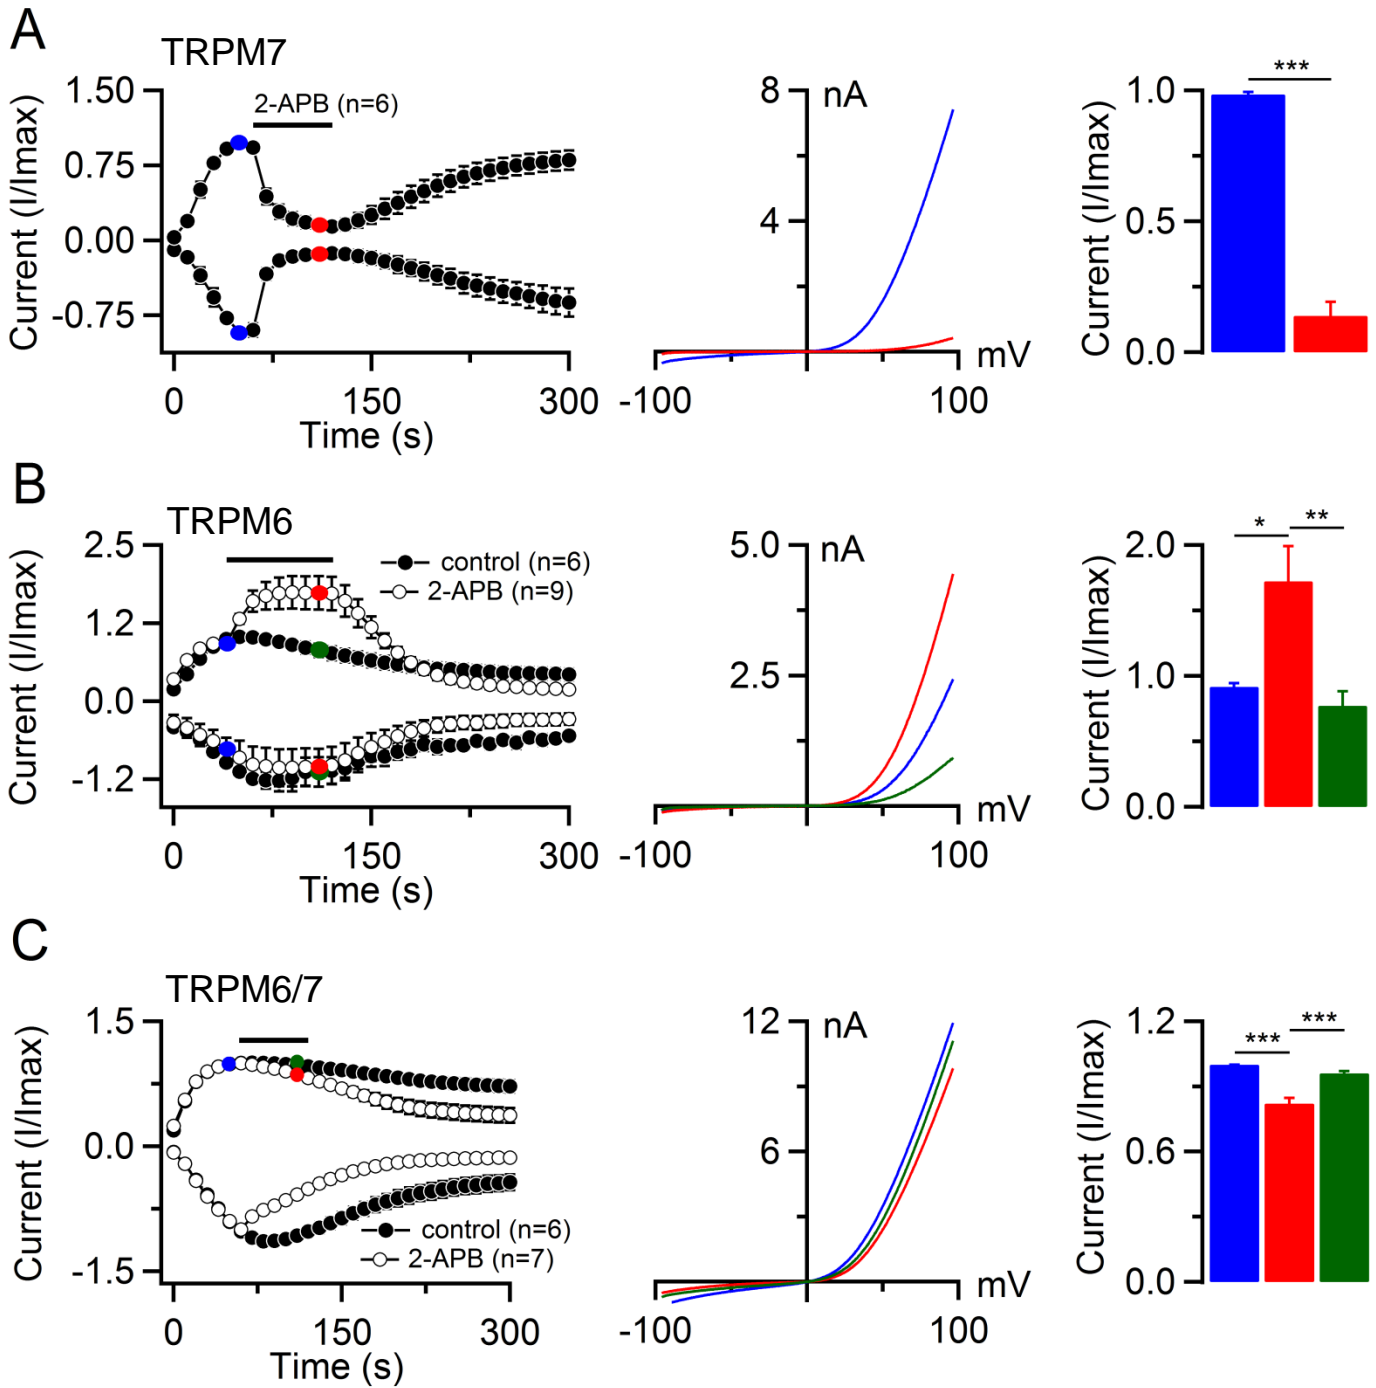

Supplement: 41598_2017_8144_MOESM1_ESM.pdf [file 41598_2017_8144_MOESM1_ESM.pdf]
